# Supplementary material for: Defense suppression benefits herbivores that have a monopoly on their feeding site but can backfire within natural communities
Source: PubMed Central journal article supplement (PMC4258945; doi:10.1186/s12915-014-0098-9), 2014-11-18

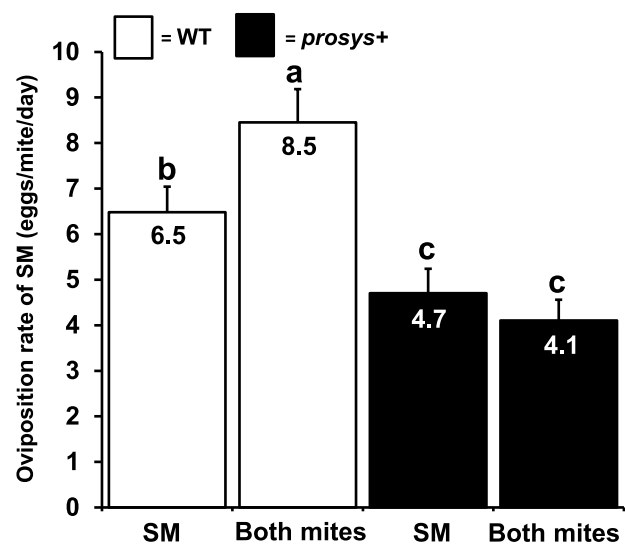

Supplement: 12915_2014_98_MOESM3_ESM.pdf [file 12915_2014_98_MOESM3_ESM.pdf]
