# Supplementary material for: Defense suppression benefits herbivores that have a monopoly on their feeding site but can backfire within natural communities
Source: PubMed Central journal article supplement (PMC4258945; doi:10.1186/s12915-014-0098-9), 2014-11-18
Supplement: 12915_2014_98_MOESM4_ESM.pdf [file 12915_2014_98_MOESM4_ESM.pdf]

Species currently displayed:

Aculops lycopersici x Tetranychus urticae x Pseudomonas syringae pv. tomato x

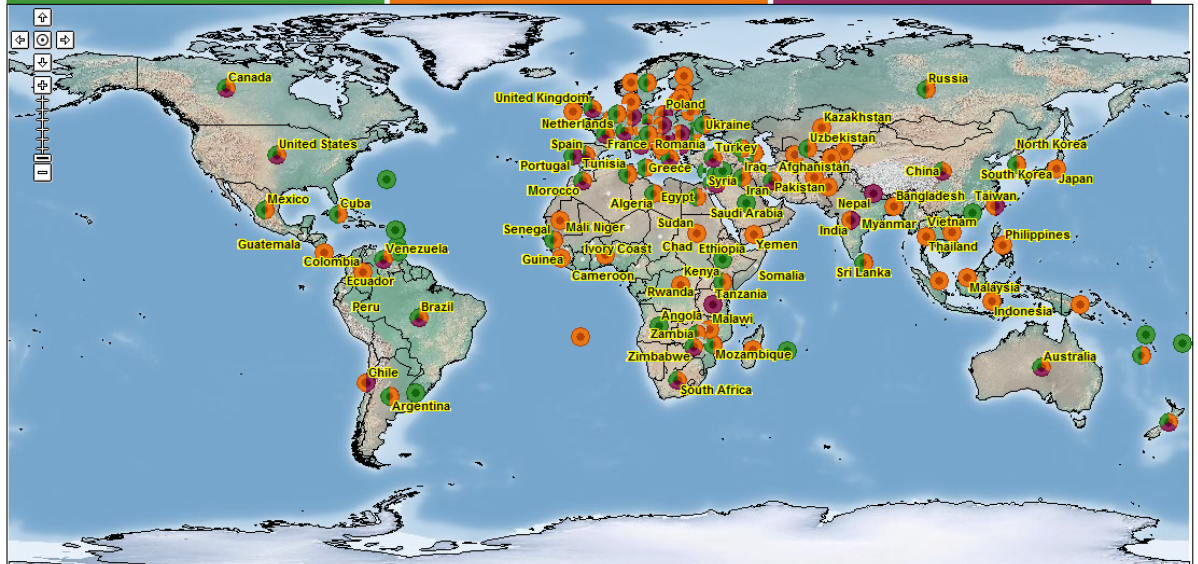

Country level records, 1 species

- Species 1
- Species 2
- Species 3

Country level records, 2 species

- Species 1 & 2
- Species 1 & 3
- Species 2 & 3

Country level, species 1, 2 & 3
