# Supplementary material for: Defense suppression benefits herbivores that have a monopoly on their feeding site but can backfire within natural communities
Source: PubMed Central journal article supplement (PMC4258945; doi:10.1186/s12915-014-0098-9), 2014-11-18
Supplement: 12915_2014_98_MOESM8_ESM.pdf [file 12915_2014_98_MOESM8_ESM.pdf]

**Table S2: Accession numbers of the transcripts quantified by qRT-PCR and their primer sequences.**

| <b>Target Gene</b> | <b>GenBank (GB) ID</b> | <b>GenModel (ITAG2.3)</b> | <b>Primer Sequence</b>                                                |
|--------------------|------------------------|---------------------------|-----------------------------------------------------------------------|
| <i>ACT</i>         | XM_004235020.1         | Solyc03g078400.2          | QF 5'-TTAGCACCTTCCAGCAGATGT-3'<br>QR 5'-AACAGACAGGACACTCGCACT-3'      |
| <i>PPO-F</i>       | AK247126.1             | Solyc08g074630.1.1        | QF 5'-CGGAGTTTGCAGGGAGTTATAC-3'<br>QR 5'-TTGATCTCCACACTTTCAATGG-3'    |
| <i>TD-II</i>       | M61915.1               | Solyc09g008670.2          | QF 5'-TGCCGTTAAAAATGTCACCA-3'<br>QR 5'-ACTGGCGATGCCAAAATATC-3'        |
| <i>JIP-21</i>      | AJ295638.1             | Solyc03g098790.1          | QF 5'-ACTCGTCCTGTGCTTTGTCC-3'<br>QR 5'-CCCAAGAGGATTTTCGTTGA-3'        |
| <i>WIPI-II</i>     | AY129402.1             | Solyc03g020080.2          | QF 5'-GACAAGGTACTAGTAATCAATTATCC-3'<br>QR 5'-GGGCATATCCCGAACCCAAGA-3' |
| <i>PR-P6</i>       | M69248.1               | Solyc00g174340.1          | QF 5'-GTACTGCATCTTCTTGTTC-3'<br>QR 5'-TAGATAAGTGCTTGATGTCCA-3'        |
